# Supplementary material for: Outcome of Atezolizumab Plus Bevacizumab Combination Therapy in High-Risk Patients with Advanced Hepatocellular Carcinoma
Source: MDPI journal article supplement (doi:10.3390/cancers16040838), 2024-02-19
Supplement: s1 [file s1]

## Supplementary Materials

### Outcome of Atezolizumab plus Bevacizumab Combination Therapy in High-Risk Patients with Advanced Hepatocellular Carcinoma

Sang Youn Hwang <sup>1,†</sup>, Hyun Young Woo <sup>2,†</sup>, Jeong Heo <sup>2,\*‡</sup>, Hyung Jun Kim <sup>1</sup>, Young Joo Park <sup>2</sup>, Ki Youn Yi <sup>2</sup>, Yu Rim Lee <sup>3</sup>, Soo Young Park <sup>3</sup>, Woo Jin Chung <sup>4</sup>, Byoung Kuk Jang <sup>4</sup> and Won Young Tak <sup>3,\*‡</sup>

|                 |    |
|-----------------|----|
| Table S1.....   | 2  |
| Table S2.....   | 5  |
| Table S3.....   | 8  |
| Table S4.....   | 11 |
| Table S5.....   | 12 |
| Table S6.....   | 15 |
| Table S7.....   | 18 |
| Table S8.....   | 22 |
| Table S9.....   | 26 |
| Figure S1.....  | 29 |
| Figure S2.....  | 30 |
| Figure S3.....  | 31 |
| Figure S4.....  | 32 |
| References..... | 33 |

Table S1. Comparison of baseline characteristics between patients with radiation and without radiation therapy in the total population.

| Variables                                | Radiation ( <i>n</i> =128)<br><i>n</i> (%) or median<br>(range) | Without Radiation<br>( <i>n</i> =87)<br><i>n</i> (%) or median<br>(range) | <i>p</i> -Value |
|------------------------------------------|-----------------------------------------------------------------|---------------------------------------------------------------------------|-----------------|
| Age in years                             | 61.5 (40-84)                                                    | 66 (39-93)                                                                | 0.006           |
| Male sex                                 | 108 (84.4)                                                      | 74 (85.1)                                                                 | 1.000           |
| Etiology                                 |                                                                 |                                                                           | 0.111           |
| Hepatitis B                              | 76 (59.4)                                                       | 43 (49.4)                                                                 |                 |
| Hepatitis C                              | 21 (16.4)                                                       | 12 (13.8)                                                                 |                 |
| Hepatitis B + hepatitis C<br>coinfection | 0 (0)                                                           | 2 (2.3)                                                                   |                 |
| Non-viral                                | 31 (24.2)                                                       | 30 (34.5)                                                                 |                 |
| ECOG performance status<br>score         |                                                                 |                                                                           | 0.055           |
| 0                                        | 92 (71.9)                                                       | 51 (58.6)                                                                 |                 |
| 1                                        | 36 (28.1)                                                       | 36 (41.4)                                                                 |                 |
| Child-Pugh classification                |                                                                 |                                                                           | 0.594           |
| A5                                       | 94 (73.4)                                                       | 60 (69)                                                                   |                 |
| A6                                       | 20 (15.6)                                                       | 12 (13.8)                                                                 |                 |
| B7                                       | 12 (9.4)                                                        | 12 (13.8)                                                                 |                 |

|                                                  |                      |                  |        |
|--------------------------------------------------|----------------------|------------------|--------|
| B8                                               | 2 (1.6)              | 2 (2.3)          |        |
| B9                                               | 0 (0)                | 1 (1.1)          |        |
| Barcelona Clinic liver cancer stage              |                      |                  | <0.001 |
| A                                                | 0                    | 0                |        |
| B                                                | 7 (5.5)              | 22 (25.3)        |        |
| C                                                | 121 (94.5)           | 65 (74.7)        |        |
| Alpha-fetoprotein, ng/mL                         | 610.1 (1.3-121,000)  | 81 (1.3-100,000) | 0.712  |
| Alpha-fetoprotein>400 ng/mL                      | 55 (43)              | 35 (40.2)        | 0.778  |
| DCP, mAU/ml                                      | 3722 (14.45-615,936) | 184 (13-239,099) | 0.626  |
| Macrovascular invasion                           | 77 (60.2)            | 31 (35.6)        | 0.001  |
| Vp4 portal vein thrombus,                        | 45 (35.2)            | 25 (28.7)        | 0.375  |
| Bile duct invasion                               | 16 (12.5)            | 7 (8.0)          | 0.372  |
| Liver infiltration>50%                           | 26 (20.3)            | 22 (25.3)        | 0.408  |
| High risk group                                  | 61 (47.7)            | 37 (42.5)        | 0.488  |
| Extrahepatic metastasis                          | 81 (63.3)            | 48 (55.2)        | 0.258  |
| Prior local therapy for Hepatocellular carcinoma | 85 (66.4)            | 55 (63.2)        | 0.663  |
| Varices                                          |                      |                  |        |
| Present at baseline                              | 67 (52.3)            | 41 (47.1)        | 0.489  |

|                                |                      |                      |       |
|--------------------------------|----------------------|----------------------|-------|
| Treated at baseline            | 9 (7.0)              | 6 (6.9)              | 1.000 |
| WBC (/mm <sup>3</sup> )        | 5,490 (1,390-15,500) | 5,930 (2,510-27,540) | 0.149 |
| Hb (g/dL)                      | 12.8 (6.5-20.5)      | 12.6 (8.1-17.6)      | 0.524 |
| AST (U/L)                      | 51 (16-550)          | 50 (16-373)          | 0.927 |
| ALT (U/L)                      | 29.5 (8-349)         | 26 (6-125)           | 0.244 |
| Albumin (g/dL)                 | 3.9 (2.6-4.8)        | 3.9 (2.1-5.0)        | 0.482 |
| Total bilirubin (mg/dL)        | 0.9 (0.2-6.6)        | 0.9 (0.3-4.0)        | 0.695 |
| Prothrombin time (INR)         | 1.10 (0.88-1.56)     | 1.14 (0.92-1.74)     | 0.022 |
| Neutrophil to lymphocyte ratio |                      |                      | 0.089 |
|                                | 28 (22)              | 36 (41.4)            | 0.004 |
| ≤2.25                          | 99 (78)              | 51 (58.6)            |       |
| >2.25                          |                      |                      |       |
| ALBI grade                     |                      |                      | 0.228 |
| 1                              | 59 (46.1)            | 40 (46)              |       |
| 2                              | 67 (52.3)            | 42 (48.3)            |       |
| 3                              | 2 (1.6)              | 5 (5.7)              |       |

Abbreviations: ECOG, Eastern Cooperative Oncology Group; DCP, des-gamma-carboxy prothrombin; WBC, white blood cells; Hb, hemoglobin; ANC, absolute neutrophil count; AST, aspartate aminotransferase; ALT, alanine aminotransferase; ALBI, albumin-bilirubin.

Table S2. Comparison of baseline characteristics between patients with radiation and without radiation therapy in the non-high-risk population.

| Variables                                | Radiation ( <i>n</i> =67)<br><br><i>n</i> (%) or median<br>(range) | Without Radiation<br>( <i>n</i> =50)<br><br><i>n</i> (%) or median<br>(range) | <i>p</i> -Value |
|------------------------------------------|--------------------------------------------------------------------|-------------------------------------------------------------------------------|-----------------|
| Age in years                             | 65 (47-81)                                                         | 68.5 (43-86)                                                                  | 0.044           |
| Male sex                                 | 56 (83.6)                                                          | 42 (84.0)                                                                     |                 |
| Etiology                                 |                                                                    |                                                                               | 0.320           |
| Hepatitis B                              | 38 (56.7)                                                          | 23 (46.0)                                                                     |                 |
| Hepatitis C                              | 14 (20.9)                                                          | 9 (18.0)                                                                      |                 |
| Hepatitis B + hepatitis C<br>coinfection | 0 (0)                                                              | 1 (2.0)                                                                       |                 |
| Non-viral                                | 15 (22.4)                                                          | 17 (34.0)                                                                     |                 |
| ECOG performance status<br>score         |                                                                    |                                                                               | 0.299           |
| 0                                        | 51 (76.1)                                                          | 33 (66)                                                                       |                 |
| 1                                        | 16 (23.9)                                                          | 17 (34)                                                                       |                 |
| Child-Pugh classification                |                                                                    |                                                                               |                 |
| A5                                       | 59 (88.1)                                                          | 42 (84.0)                                                                     |                 |
| A6                                       | 3 (4.5)                                                            | 3 (6.0)                                                                       |                 |
| B7                                       | 5 (7.5)                                                            | 4 (8.0)                                                                       |                 |

|                                                  |                      |                      |        |
|--------------------------------------------------|----------------------|----------------------|--------|
| B8                                               | 0 (0)                | 1 (2.0)              |        |
| Barcelona Clinic liver cancer stage              |                      |                      | <0.001 |
| A                                                | 0                    | 0                    |        |
| B                                                | 6 (9.0)              | 19 (38.0)            |        |
| C                                                | 61 (91.0)            | 31 (62.0)            |        |
| Alpha-fetoprotein, ng/mL                         | 81.3 (1.3-100,000)   | 74.7 (1.3-46,405)    | 0.572  |
| Alpha-fetoprotein>400 ng/mL                      | 23 (34.3)            | 15 (30.3)            | 0.692  |
| DCP, mAU/ml                                      | 279 (13-68,999)      | 143.5 (14.0-239,099) | 0.457  |
| Macrovascular invasion                           | 22 (32.8)            | 5 (10.0)             | 0.004  |
| Extrahepatic metastasis                          | 45 (67.2)            | 29 (58.0)            | 0.337  |
| Prior local therapy for Hepatocellular carcinoma | 58 (86.6)            | 41 (82.0)            | 0.606  |
| Varices                                          |                      |                      |        |
| Present at baseline                              | 29 (43.3)            | 20 (40.0)            | 0.850  |
| Treated at baseline                              | 1 (1.5)              | 2 (4.0)              | 0.575  |
| WBC (/mm <sup>3</sup> )                          | 5,090 (1,390-11,150) | 5,675 (2,510-24,440) | 0.587  |
| Hb (g/dL)                                        | 12.9 (6.5-20.5)      | 13.0 (8.3-17.0)      | 0.862  |
| AST (U/L)                                        | 38 (18-331)          | 35 (16-156)          | 0.274  |
| ALT (U/L)                                        | 28 (8-349)           | 24.5 (6-91)          | 0.190  |
| Albumin (g/dL)                                   | 4.1 (2.7-4.7)        | 4.0 (2.1-5.0)        | 0.636  |

|                                |                   |                   |        |
|--------------------------------|-------------------|-------------------|--------|
| Total bilirubin (mg/dL)        | 0.80 (0.25-2.49)  | 0.80 (0.30-2.40)  | 0.842  |
| Prothrombin time (INR)         | 1.08 (0.88-1.44)  | 1.13 (0.92-1.64)  | 0.074  |
| Neutrophil to lymphocyte ratio | 3.22 (0.25-11.85) | 2.15 (0.77-12.96) | <0.001 |
|                                | 13 (19.4)         | 29 (58.0)         | <0.001 |
| ≤2.25                          | 54 (80.6)         | 21 (42.0)         |        |
| >2.25                          |                   |                   |        |
| ALBI grade                     |                   |                   | 0.673  |
| 1                              | 41 (61.2)         | 31 (62.0)         |        |
| 2                              | 25 (37.3)         | 17 (34.0)         |        |
| 3                              | 1 (1.5)           | 2 (4.0)           |        |

Abbreviations: ECOG, Eastern Cooperative Oncology Group; DCP, des-gamma-carboxy prothrombin; WBC, white blood cells; Hb, hemoglobin; ANC, absolute neutrophil count; AST, aspartate aminotransferase; ALT, alanine aminotransferase; ALBI, albumin-bilirubin.

Table S3. Comparison of baseline characteristics between patients with radiation and without radiation therapy in the high-risk population.

| Variables                                | Radiation ( <i>n</i> =61)<br><i>n</i> (%) or median<br>(range) | Without Radiation<br>( <i>n</i> =37)<br><i>n</i> (%) or median<br>(range) | <i>p</i> -Value |
|------------------------------------------|----------------------------------------------------------------|---------------------------------------------------------------------------|-----------------|
| Age in years                             | 58 (40-84)                                                     | 65 (39-92)                                                                | 0.054           |
| Male sex                                 | 52 (85.2)                                                      | 32 (86.5)                                                                 | 1.000           |
| Etiology                                 |                                                                |                                                                           | 0.426           |
| Hepatitis B                              | 38 (62.3)                                                      | 20 (54.1)                                                                 |                 |
| Hepatitis C                              | 7 (11.5)                                                       | 3 (8.1)                                                                   |                 |
| Hepatitis B + hepatitis C<br>coinfection | 0 (0)                                                          | 1 (2.7)                                                                   |                 |
| Non-viral                                | 16 (26.2)                                                      | 13 (35.1)                                                                 |                 |
| ECOG performance status<br>score         |                                                                |                                                                           | 0.089           |
| 0                                        | 41 (67.2)                                                      | 18 (48.6)                                                                 |                 |
| 1                                        | 20 (32.8)                                                      | 19 (51.4)                                                                 |                 |
| Child-Pugh classification                |                                                                |                                                                           | 0.455           |
| A5                                       | 35 (57.4)                                                      | 18 (48.6)                                                                 |                 |
| A6                                       | 17 (27.9)                                                      | 9 (24.3)                                                                  |                 |
| B7                                       | 7 (11.5)                                                       | 8 (21.6)                                                                  |                 |



|                                                  |                       |                        |       |
|--------------------------------------------------|-----------------------|------------------------|-------|
| B8                                               | 2 (3.3)               | 1 (2.7)                |       |
| B9                                               | 0 (0)                 | 1 (2.7)                |       |
| Barcelona Clinic liver cancer stage              |                       |                        | 0.149 |
| A                                                | 0                     | 0                      |       |
| B                                                | 1 (1.6)               | 3 (8.1)                |       |
| C                                                | 60 (98.4)             | 34 (91.9)              |       |
| Alpha-fetoprotein, ng/mL                         | 670.0 (1.3-102,687)   | 550.2 (2.2-121,000)    | 0.673 |
| Alpha-fetoprotein≥400 ng/mL                      | 32 (52.5)             | 20 (54.1)              |       |
| DCP, mAU/ml                                      | 2531.5 (16.0-615,936) | 14648.5 (14.4-406,124) | 0.004 |
| Macrovascular invasion                           | 55 (90.2)             | 26 (70.3)              | 0.025 |
| Vp4 portal vein thrombus,                        | 45 (73.8)             | 25 (67.6)              | 0.645 |
| Bile duct invasion                               | 16 (26.2)             | 7 (18.9)               | 0.469 |
| Liver infiltration>50%                           | 26 (42.6)             | 22 (59.5)              | 0.145 |
| Extrahepatic metastasis                          | 36 (59.0)             | 19 (51.4)              | 0.531 |
| Prior local therapy for Hepatocellular carcinoma | 27 (44.3)             | 14 (37.8)              | 0.673 |
| Varices                                          |                       |                        |       |
| Present at baseline                              | 38 (62.3)             | 21 (56.8)              | 0.672 |
| Treated at baseline                              | 8 (13.1)              | 4 (10.8)               | 1.000 |

|                                |                      |                      |       |
|--------------------------------|----------------------|----------------------|-------|
| WBC (/mm <sup>3</sup> )        | 6,060 (2,940-15,500) | 6,670 (2,940-27,540) | 0.059 |
| Hb (g/dL)                      | 12.6 (6.9-17.5)      | 11.7 (8.1-17.6)      | 0.326 |
| AST (U/L)                      | 63 (16-550)          | 76 (31-373)          | 0.147 |
| ALT (U/L)                      | 36 (9-281)           | 33 (10-125)          | 0.968 |
| Albumin (g/dL)                 | 3.7 (2.6-4.6)        | 3.6 (2.5-4.6)        | 0.313 |
| Total bilirubin (mg/dL)        | 0.91 (0.27-6.60)     | 1.00 (0.41-4.00)     | 0.301 |
| Prothrombin time (INR)         | 1.14 (0.93-1.56)     | 1.14 (0.93-1.74)     | 0.095 |
| Neutrophil to lymphocyte ratio | 3.64 (1.38-15.09)    | 4.01 (1.42-19.73)    | 0.109 |
|                                | 15 (25.0)            | 7 (18.9)             | 0.620 |
| ≤2.25                          | 45 (75.0)            | 30 (81.0)            |       |
| >2.25                          |                      |                      |       |
| ALBI grade                     |                      |                      | 0.274 |
| 1                              | 18 (29.5)            | 9 (24.3)             |       |
| 2                              | 42 (68.9)            | 25 (67.6)            |       |
| 3                              | 1 (1.6)              | 3 (8.1)              |       |

Abbreviations: ECOG, Eastern Cooperative Oncology Group; DCP, des-gamma-carboxy prothrombin; WBC, white blood cells; Hb, hemoglobin; ANC, absolute neutrophil count; AST, aspartate aminotransferase; ALT, alanine aminotransferase; ALBI, albumin-bilirubin.

Table S4. Treatment responses of the total population, high-risk population, and non-high-risk population based on RECIST version 1.1.

| Best Responses          | Rate                                     |                              |                                   |
|-------------------------|------------------------------------------|------------------------------|-----------------------------------|
|                         | Overall popula-<br>tion ( <i>n</i> =215) | High risk<br>( <i>n</i> =98) | Non-high<br>risk ( <i>n</i> =117) |
| Complete response       | 4 (1.9)                                  | 0 (0)                        | 4 (3.4)                           |
| Partial response        | 43 (20.0)                                | 23 (23.5)                    | 20 (17.1)                         |
| Stable disease          | 112 (52.1)                               | 43 (43.9)                    | 69 (59.0)                         |
| Progressive disease     | 56 (26.0)                                | 32 (32.6)                    | 24 (20.5)                         |
| Objective response rate | 47 (21.9)                                | 23 (23.5)                    | 24 (20.5)                         |
| Disease control rate    | 159 (74.0)                               | 66 (67.3)                    | 93 (79.5)                         |

Abbreviations: RECIST, Response Evaluation Criteria in Solid Tumors.

Table S5. Univariate and multivariate analysis of factors associated with disease control rate in the total population.

| Subgroup                  | Responders/n | DCR (%) | <i>p</i> -Value * | <i>p</i> -Value ** |
|---------------------------|--------------|---------|-------------------|--------------------|
| All patients              | 159/215      | 73.9    |                   |                    |
| Age, years <65            | 78/113       | 69      | 0.126             |                    |
| ≥65                       | 81/102       | 79.4    |                   |                    |
| Sex                       |              |         | 0.252             |                    |
| Male                      | 137/182      | 75.2    |                   |                    |
| Female                    | 22/33        | 66.7    |                   |                    |
| Etiology                  |              |         | 0.365             |                    |
| Hepatitis B               | 84/119       | 70.5    |                   |                    |
| Hepatitis C               | 27/33        | 81.8    |                   |                    |
| Hepatitis B + hepatitis C | 1/2          | 50      |                   |                    |
| Non-viral                 | 47/61        | 77      |                   |                    |
| ECOG performance status   |              |         | 0.677             |                    |
|                           | 104/143      | 76.5    |                   |                    |
| 0                         | 55/72        | 69.6    |                   |                    |
| 1                         |              |         |                   |                    |
| Child-Pugh class          |              |         | 0.375             |                    |
| A                         | 140/186      | 75.7    |                   |                    |
| B                         | 19/29        | 65.5    |                   |                    |
| Child-Pugh score          |              |         | 0.206             |                    |
| 5A                        | 119/154      | 77.2    |                   |                    |
| 6A                        | 21/32        | 65.6    |                   |                    |
| 7B                        | 15/24        | 62.5    |                   |                    |
| 8B                        | 4/4          | 100     |                   |                    |
| 9B                        | 0/1          | 0       |                   |                    |
| Ascites                   |              |         | 0.781             |                    |

|                          |         |      |        |       |
|--------------------------|---------|------|--------|-------|
| Absent at baseline       | 146/195 | 74.9 |        |       |
| Present at baseline      | 13/20   | 65   |        |       |
| Barcelona Clinic Liver   |         |      | 0.124  |       |
| Cancer stage             |         |      |        |       |
| B                        | 25/29   | 86.2 |        |       |
| C                        | 134/186 | 72.8 |        |       |
| Alpha-fetoprotein at     |         |      | 0.001  | 0.029 |
| baseline (ng/ml)         |         |      |        |       |
| ≤400                     | 103/125 | 82.4 |        |       |
| >400                     | 56/90   | 62.2 |        |       |
| DCP at baseline          |         |      | 0.031  | 0.933 |
| (mAU/ml)                 | 97/123  | 78.8 |        |       |
| ≤2000                    | 59/88   | 67.0 |        |       |
| >2000                    |         |      |        |       |
| Macrovascular invasion   |         |      | 0.968  |       |
| at baseline              |         |      |        |       |
| No                       | 80/107  | 74.8 |        |       |
| Yes                      | 79/108  | 73.1 |        |       |
| Extrahepatic metastasis  |         |      | 0.015  | 0.036 |
| No                       | 71/86   | 82.5 |        |       |
| Yes                      | 88/129  | 68.2 |        |       |
| Vp4 portal vein thrombus |         |      | 0.449  |       |
| No                       | 106/145 | 73.1 |        |       |
| Yes                      | 53/70   | 75.7 |        |       |
| Bile duct invasion       |         |      | 0.108  |       |
| No                       | 145/192 | 75.5 |        |       |
| Yes                      | 14/23   | 60.9 |        |       |
| Liver infiltration over  |         |      | <0.001 | 0.005 |

|                         |         |      |       |       |
|-------------------------|---------|------|-------|-------|
| 50%                     | 135/167 | 80.7 |       |       |
| No                      | 24/48   | 51.0 |       |       |
| Yes                     |         |      |       |       |
| Prior local therapy     |         |      | 0.620 |       |
| No                      | 53/74   | 71.6 |       |       |
| Yes                     | 106/141 | 75.1 |       |       |
| Neoadjuvant or concomi- |         |      | 0.481 |       |
| tant radiation therapy  |         |      |       |       |
| No                      |         |      |       |       |
| Yes                     | 62/87   | 71.2 |       |       |
|                         | 97/128  | 75.7 |       |       |
| Neutrophil to lympho-   |         |      | 0.002 | 0.035 |
| cyte ratio              |         |      |       |       |
| ≤2.25                   | 57/64   | 89.1 |       |       |
| >2.25                   | 101/150 | 67.3 |       |       |
| ALBI grade              |         |      | 0.020 | 0.273 |
| 1                       | 81/99   | 81.8 |       |       |
| 2                       | 74/109  | 69.2 |       |       |
| 3                       | 4/7     | 57.1 |       |       |

---

Abbreviations: DCR, disease control rate; ECOG, Eastern Cooperative Oncology Group; DCP, des-gamma-carboxy prothrombin; ALBI, albumin-bilirubin.

\**p* value by univariate analysis

\*\* *p* value by multivariate analysis

Table S6. Univariate and multivariate analysis of factors associated with disease control rate in the high-risk population.

| Subgroup                  | Responders/ <i>n</i> | DCR (%) | <i>p</i> -Value * | <i>p</i> -Value ** |
|---------------------------|----------------------|---------|-------------------|--------------------|
| All patients              | 66/98                | 67.3    |                   |                    |
| Age, years <65            | 37/60                | 61.6    | 0.195             |                    |
| ≥65                       | 29/38                | 76.3    |                   |                    |
| Sex                       |                      |         | 0.758             |                    |
| Male                      | 57/84                | 67.8    |                   |                    |
| Female                    | 9/14                 | 64.3    |                   |                    |
| Etiology                  |                      |         | 0.389             |                    |
| Hepatitis B               | 38/58                | 65.5    |                   |                    |
| Hepatitis C               | 6/10                 | 60      |                   |                    |
| Hepatitis B + Hepatitis C | 0/1                  | 0       |                   |                    |
| Non-viral                 | 22/29                | 75.9    |                   |                    |
| ECOG performance status   |                      |         | 0.308             |                    |
| 0                         | 36/49                | 73.5    |                   |                    |
| 1                         | 30/49                | 61.2    |                   |                    |
| Child-Pugh class          |                      |         | 0.438             |                    |
| A                         | 55/79                | 69.6    |                   |                    |
| B                         | 11/19                | 57.8    |                   |                    |
| Child-Pugh score          |                      |         | 0.356             |                    |
| 5A                        | 38/53                | 71.7    |                   |                    |
| 6A                        | 17/26                | 65.3    |                   |                    |
| 7B                        | 8/15                 | 53.3    |                   |                    |
| 8B                        | 3/3                  | 100     |                   |                    |
| 9B                        | 0/1                  | 0       |                   |                    |
| Ascites                   |                      |         | 1.000             |                    |

|                          |       |      |        |       |
|--------------------------|-------|------|--------|-------|
| Absent at baseline       | 56/82 | 68.3 |        |       |
| Present at baseline      | 10/16 | 62.5 |        |       |
| Barcelona Clinic Liver   |       |      | 0.054  |       |
| Cancer stage             |       |      |        |       |
| B                        | 1/4   | 25.0 |        |       |
| C                        | 65/94 | 69.1 |        |       |
| Alpha-fetoprotein at     |       |      | 0.177  |       |
| baseline (ng/ml)         |       |      |        |       |
| ≤400                     | 34/46 | 73.9 |        |       |
| >400                     | 32/52 | 61.5 |        |       |
| DCP at baseline          |       |      | 0.246  |       |
| (mAU/ml)                 |       |      |        |       |
| ≤2000                    | 28/39 | 71.7 |        |       |
| >2000                    | 36/56 | 64.2 |        |       |
| Macrovascular invasion   |       |      | 0.001  | 0.692 |
| at baseline              |       |      |        |       |
| No                       | 6/17  | 35.3 |        |       |
| Yes                      | 60/81 | 74.1 |        |       |
| Extrahepatic metastasis  |       |      | 0.165  |       |
| No                       | 32/43 | 74.4 |        |       |
| Yes                      | 34/55 | 61.8 |        |       |
| Vp4 portal vein thrombus |       |      | 0.002  | 0.311 |
| No                       | 13/28 | 46.4 |        |       |
| Yes                      | 53/70 | 75.7 |        |       |
| Bile duct invasion       |       |      | 0.350  |       |
| No                       | 52/75 | 69.3 |        |       |
| Yes                      | 14/23 | 60.9 |        |       |
| Liver infiltration over  |       |      | <0.001 | 0.007 |



|                                              |       |      |       |       |  |
|----------------------------------------------|-------|------|-------|-------|--|
| 50%                                          |       |      |       |       |  |
| No                                           | 42/50 | 84.0 |       |       |  |
| Yes                                          | 24/48 | 50.0 |       |       |  |
| Prior local therapy                          |       |      | 0.503 |       |  |
| No                                           | 40/57 | 70.1 |       |       |  |
| Yes                                          | 26/41 | 63.4 |       |       |  |
| Neoadjuvant or concomitant radiation therapy |       |      | 0.031 | 0.315 |  |
| No                                           |       |      |       |       |  |
| Yes                                          | 20/37 | 54.1 |       |       |  |
|                                              | 46/61 | 75.4 |       |       |  |
| Neutrophil to lymphocyte ratio               |       |      | 0.019 | 0.148 |  |
| ≤2.25                                        | 20/22 | 90.9 |       |       |  |
| >2.25                                        | 45/75 | 60.0 |       |       |  |
| ALBI grade                                   |       |      | 0.033 | 0.260 |  |
| 1                                            | 23/27 | 85.2 |       |       |  |
| 2                                            | 41/67 | 61.2 |       |       |  |
| 3                                            | 2/4   | 50   |       |       |  |

---

Abbreviations: DCR, disease control rate; ECOG, Eastern Cooperative Oncology Group; DCP, des-gamma-carboxy prothrombin; ALBI, albumin-bilirubin.

\**p* value by univariate analysis

\*\* *p* value by multivariate analysis

Table S7. Univariate and multivariate analysis of factors associated with progression-free survival (PFS) in the total population.

| Subgroup                  | Events/<br>patients | Median PFS,<br>months (95% CI) | <i>p</i> -Value * | <i>p</i> -Value ** |
|---------------------------|---------------------|--------------------------------|-------------------|--------------------|
| All patients              | 122/215             | 8.00 (6.82-9.18)               |                   |                    |
| Age, years <65            | 71/113              | 7.5 (6.06-8.94)                | 0.125             |                    |
| ≥65                       | 51/102              | 35 (5.32-12.18)                |                   |                    |
| Sex                       |                     |                                | 0.059             |                    |
| Male                      | 96/182              | 8.75 (7.47-10.03)              |                   |                    |
| Female                    | 26/33               | 6.25 (3.14-9.36)               |                   |                    |
| Etiology                  |                     |                                | 0.336             |                    |
| Hepatitis B               | 74/119              | 7 (5.35-8.65)                  |                   |                    |
| Hepatitis C               | 14/33               | 10.5 (7.00-14.00)              |                   |                    |
| Hepatitis B + hepatitis C | 1/2                 | 1.25 (-)                       |                   |                    |
| Non-viral                 | 33/61               | 8.25 (5.63-10.87)              |                   |                    |
| ECOG performance status   |                     |                                | 0.511             |                    |
| 0                         | 79/143              | 8.25 (6.86-9.64)               |                   |                    |
| 1                         | 43/72               | 7.25 (5.49-9.01)               |                   |                    |
| Child-Pugh score          |                     |                                | 0.001             | 0.828              |
| 5A                        | 76/154              | 35 (31.05-38.95)               |                   |                    |
| 6A                        | 23/32               | 19 (9.95-28.05)                |                   |                    |
| 7B                        | 20/24               | 13 (4.6-21.40)                 |                   |                    |
| 8B                        | 3/4                 | 36 (15.20-56.80)               |                   |                    |
| 9B                        | 0/1                 | -                              |                   |                    |
| Ascites                   |                     |                                | 0.020             | 0.233              |
| Absent at baseline        | 107/195             | 8.25 (7.14-9.36)               |                   |                    |
| Present at baseline       | 15/20               | 4.00 (1.77-6.23)               |                   |                    |

|                          |         |                    |        |       |
|--------------------------|---------|--------------------|--------|-------|
| Barcelona Clinic Liver   |         |                    | 0.084  |       |
| Cancer stage             |         |                    |        |       |
| B                        | 9/29    | 11.75 (6.72-16.78) |        |       |
| C                        | 113/186 | 7.5 (6.24-8.76)    |        |       |
| Alpha-fetoprotein at     |         |                    | 0.008  | 0.184 |
| baseline (ng/ml)         |         |                    |        |       |
| ≤400 ng/ml               | 61/125  | 9 (8.00-10.00)     |        |       |
| >400 ng/ml               | 61/90   | 5.25 (2.94-7.56)   |        |       |
| DCP at baseline          |         |                    | 0.004  | 0.119 |
| (mAU/ml)                 |         |                    |        |       |
| ≤2000                    | 58/123  | 9.25 (8.24-10.26)  |        |       |
| >2000                    | 61/88   | 5.75 (3.89-7.61)   |        |       |
| Macrovascular invasion   |         |                    | 0.074  |       |
| at baseline              |         |                    |        |       |
| No                       | 51/107  | 9 (6.44-11.56)     |        |       |
| Yes                      | 71/108  | 7.5 (6.11-8.89)    |        |       |
| Extrahepatic metastasis  |         |                    | 0.099  |       |
| No                       | 43/86   | 9.25 (8.28-10.22)  |        |       |
| Yes                      | 79/129  | 6.5 (5.26-7.74)    |        |       |
| Vp4 portal vein thrombus |         |                    | 0.165  |       |
| No                       | 76/145  | 8.25 (6.74-9.76)   |        |       |
| Yes                      | 46/70   | 7.75 (5.71-9.79)   |        |       |
| Bile duct invasion       |         |                    | 0.099  |       |
| No                       | 104/192 | 8.25 (7.02-9.48)   |        |       |
| Yes                      | 18/23   | 4.75 (2.01-7.49)   |        |       |
| Liver infiltration over  |         |                    | <0.001 | 0.091 |
| 50%                      |         |                    |        |       |
| No                       | 83/167  | 8.75 (7.93-9.57)   |        |       |

|                                              |        |                    |        |       |
|----------------------------------------------|--------|--------------------|--------|-------|
| Yes                                          | 39/48  | 3.00 (2.36-3.89)   |        |       |
| Prior local therapy                          |        |                    | 0.076  |       |
| No                                           | 47/75  | 6.25 (4.28-8.22)   |        |       |
| Yes                                          | 75/140 | 8.74 (7.88-9.62)   |        |       |
| Neoadjuvant or concomitant radiation therapy |        |                    | 0.495  |       |
| No                                           |        |                    |        |       |
| Yes                                          | 46/87  | 7 (5.25-8.75)      |        |       |
|                                              | 76/128 | 8.25 (7.10-9.40)   |        |       |
| Varices                                      |        |                    | 0.033  | 0.934 |
| absent at baseline                           | 50/107 | 9.26 (6.68-11.82)  |        |       |
| present at baseline                          | 72/108 | 7.25 (5.98-8.52)   |        |       |
| Hb level                                     |        |                    | 0.003  | 0.265 |
| ≤12.5                                        | 68/99  | 6.25 (4.86-7.64)   |        |       |
| >12.5                                        | 54/116 | 9 (7.60-10.40)     |        |       |
| Neutrophil to lymphocyte ratio               |        |                    | 0.001  | 0.004 |
| ≤2.25                                        | 26/64  | 11.25 (7.90-14.60) |        |       |
| >2.25                                        | 96/150 | 6.50 (5.14-7.86)   |        |       |
| ALBI grade                                   |        |                    | <0.001 | 0.012 |
| 1                                            | 42/99  | 9.75 (7.83-11.67)  |        |       |
| 2                                            | 74/109 | 6.00 (4.94-7.06)   |        |       |
| 3                                            | 6/7    | 5.75 (0.59-10.91)  |        |       |

Abbreviations: CI, confidence interval; PFS, progression free survival; ECOG, Eastern Cooperative Oncology Group; DCP, des-gamma-carboxy prothrombin; Hb, hemoglobin; ALBI, albumin-bilirubin.

\**p* value by univariate analysis

\*\* *p* value by multivariate analysis

Table S8. Univariate and multivariate analysis of factors associated with progression-free survival (PFS) in the high-risk population.

| Subgroup                  | Events/<br>patients | Median PFS,<br>months (95% CI) | <i>p</i> -Value * | <i>p</i> -Value ** |
|---------------------------|---------------------|--------------------------------|-------------------|--------------------|
| All patients              | 67/98               | 6.50 (3.93-9.08)               |                   |                    |
| Age, years ≤65            | 42/60               | 5.75 (2.86-8.64)               | 0.411             |                    |
| >65                       | 25/38               | 7.25 (2.53-11.97)              |                   |                    |
| Sex                       |                     |                                | 0.624             |                    |
| Male                      | 55/84               | 7.00 (4.56-9.44)               |                   |                    |
| Female                    | 12/14               | 3.25 (2.33-4.17)               |                   |                    |
| Etiology                  |                     |                                | 0.957             |                    |
| Hepatitis B               | 43/58               | 5.75 (3.38-8.12)               |                   |                    |
| Hepatitis C               | 4/10                | 18.50 (-)                      |                   |                    |
| Hepatitis B + hepatitis C | 1/1                 | 1.25 (-)                       |                   |                    |
| Non-viral                 | 19/29               | 8.25 (3.42-13.08)              |                   |                    |
| ECOG performance status   |                     |                                | 0.198             |                    |
| 0                         | 38/59               | 7.75 (5.32-10.18)              |                   |                    |
| 1                         | 29/39               | 5.00 (3.01-6.99)               |                   |                    |
| Child-Pugh score          |                     |                                | 0.066             |                    |
| 5A                        | 32/53               | 8.25 (6.49-10.01)              |                   |                    |
| 6A                        | 19/26               | 4.75 (2.63-6.87)               |                   |                    |
| 7B                        | 13/15               | 3.00 (2.05-3.95)               |                   |                    |
| 8B                        | 3/3                 | 9 (3.80-14.20)                 |                   |                    |
| 9B                        | 0/1                 | -                              |                   |                    |
| Ascites                   |                     |                                | 0.223             |                    |
| Absent at baseline        | 54/82               | 7.00 (4.81-9.19)               |                   |                    |
| Present at baseline       | 13/16               | 4.00 (2.21-5.79)               |                   |                    |

|                          |       |                   |  |       |       |
|--------------------------|-------|-------------------|--|-------|-------|
| Barcelona Clinic Liver   |       |                   |  | 0.017 | 0.538 |
| Cancer stage             |       |                   |  |       |       |
| B                        | 4/4   | 2.25 (0-4.70)     |  |       |       |
| C                        | 63/94 | 7.00 (4.62-9.38)  |  |       |       |
| Alpha-fetoprotein at     |       |                   |  | 0.102 |       |
| baseline (ng/ml)         |       |                   |  |       |       |
| ≤400                     | 29/46 | 9.00 (7.92-10.08) |  |       |       |
| >400                     | 38/52 | 4.75 (2.49-7.01)  |  |       |       |
| DCP at baseline          |       |                   |  | 0.015 | 0.032 |
| (mAU/ml)                 |       |                   |  |       |       |
| ≤2000                    | 21/39 | 9.25 (8.59-9.91)  |  |       |       |
| >2000                    | 44/56 | 4.75 (2.96-6.54)  |  |       |       |
| Macrovascular invasion   |       |                   |  | 0.020 | 0.211 |
| at baseline              |       |                   |  |       |       |
| No                       | 14/17 | 2.75 (1.74-3.76)  |  |       |       |
| Yes                      | 53/81 | 7.75 (5.75-9.75)  |  |       |       |
| Extrahepatic metastasis  |       |                   |  | 0.460 |       |
| No                       | 28/43 | 8.25 (5.29-11.21) |  |       |       |
| Yes                      | 39/55 | 5.00 (5.06-7.94)  |  |       |       |
| Vp4 portal vein thrombus |       |                   |  | 0.373 |       |
| No                       |       |                   |  |       |       |
| Yes                      | 21/28 | 3.00 (1.70-4.30)  |  |       |       |
|                          | 46/70 | 7.75 (5.71-9.79)  |  |       |       |
| Bile duct invasion       |       |                   |  | 0.406 |       |
| No                       | 49/75 | 6.50 (3.79-9.21)  |  |       |       |
| Yes                      | 18/22 | 4.75 (2.01-7.49)  |  |       |       |
| Liver infiltration over  |       |                   |  | 0.006 | 0.400 |
| 50%                      |       |                   |  |       |       |

|                                              |       |                    |        |       |
|----------------------------------------------|-------|--------------------|--------|-------|
| No                                           | 28/50 | 9.00 (7.89-10.11)  |        |       |
| Yes                                          | 39/48 | 3.00 (2.36-3.64)   |        |       |
| Prior local therapy                          |       |                    | 0.797  |       |
| No                                           | 37/57 | 5.25 (2.85-7.65)   |        |       |
| Yes                                          | 30/41 | 8.25 (4.38-12.12)  |        |       |
| Neoadjuvant or concomitant radiation therapy |       |                    | <0.001 | 0.018 |
| No                                           |       |                    |        |       |
| Yes                                          | 30/37 | 3.25 (2.27-4.23)   |        |       |
|                                              | 37/61 | 9.25 (7.66-10.84)  |        |       |
| Varices                                      |       |                    | 0.676  |       |
| absent at baseline                           | 25/39 | 4.00 (1.34-6.66)   |        |       |
| present at baseline                          | 42/59 | 7.75 (5.14-10.36)  |        |       |
| Hb level (g/dL)                              |       |                    | 0.032  | 0.090 |
| ≤12.5                                        | 40/50 | 4.00 (1.85-6.15)   |        |       |
| >12.5                                        | 27/48 | 9.00 (6.46-11.54)  |        |       |
| Neutrophil to lymphocyte ratio               |       |                    | 0.029  | 0.145 |
| ≤2.25                                        | 12/22 | 10.00 (8.11-11.89) |        |       |
| >2.25                                        | 55/75 | 4.75 (2.49-7.01)   |        |       |
| ALBI grade                                   |       |                    | 0.002  | 0.009 |
| 1                                            | 14/27 | 9.25 (6.68-11.82)  |        |       |
| 2                                            | 49/67 | 4.75 (2.83-6.67)   |        |       |
| 3                                            | 4/4   | 1.00 (0.00-5.90)   |        |       |

---

Abbreviations: CI, confidence interval; PFS, progression free survival; ECOG, Eastern Cooperative Oncology Group; DCP, des-gamma-carboxy prothrombin; Hb, hemoglobin; ALBI, albumin-bilirubin.

\**p* value by univariate analysis

\*\* *p* value by multivariate analysis

Table S9. Profiles of adverse events in the total population.

|                            | Any grade,<br><i>n</i> (%) | Grade 5 | Grade 3-4 | Grade 1-2 |
|----------------------------|----------------------------|---------|-----------|-----------|
| Proteinuria                | 51 (23.7)                  | 0       | 4         | 47        |
| Aminotransferase elevation | 36 (16.7)                  | 0       | 1         | 35        |
| Thrombocytopenia           | 35 (16.3)                  | 0       | 0         | 35        |
| Neutropenia                | 23 (10.7)                  | 0       | 0         | 23        |
| Hypertension               | 16 (7.4)                   | 0       | 0         | 16        |
| Azotemia                   | 14 (6.5)                   | 0       | 2         | 12        |
| Subclinical hypothyroidism | 13 (6.0)                   | 0       | 0         | 13        |
| General weakness           | 13 (6.0)                   | 0       | 3         | 10        |
| Dermatitis                 | 13 (6.0)                   | 0       | 2         | 11        |
| Diarrhea                   | 11 (5.1)                   | 0       | 2         | 9         |
| Hyponatremia               | 10 (4.7)                   | 0       | 0         | 10        |
| Poor oral intake           | 9 (4.2)                    | 0       | 2         | 7         |
| Varix bleeding             | 9 (4.2)                    | 0       | 9         | 0         |
| Epigastric pain            | 8 (3.7)                    | 0       | 0         | 8         |
| Pyrexia                    | 8 (3.7)                    | 0       | 1         | 7         |
| Hypokalemia                | 7 (3.3)                    | 0       | 1         | 6         |
| Jaundice                   | 7 (3.3)                    | 0       | 2         | 5         |
| Back pain                  | 6 (2.8)                    | 0       | 0         | 6         |
| Nausea                     | 6 (2.8)                    | 0       | 2         | 4         |
| Abdominal pain             | 6 (2.8)                    | 0       | 0         | 6         |
| Adrenal insufficiency      | 6 (2.7)                    | 0       | 1         | 5         |
| Pneumonitis                | 6 (2.7)                    | 2       | 2         | 2         |
| Hepatic encephalopathy     | 5 (2.3)                    | 0       | 4         | 1         |
| Anemia                     | 5 (2.3)                    | 0       | 1         | 4         |
| Pancreatitis               | 4 (1.9)                    | 0       | 0         | 4         |



|                                   |         |   |   |   |
|-----------------------------------|---------|---|---|---|
| Headache                          | 4 (1.8) | 0 | 0 | 4 |
| Peripheral edema                  | 4 (1.8) | 0 | 1 | 3 |
| Neutropenia                       | 3 (1.4) | 0 | 1 | 2 |
| Ascites                           | 3 (1.4) | 0 | 1 | 2 |
| Gastric ulcer                     | 3 (1.4) | 0 | 3 | 0 |
| Ulcer bleeding                    | 3 (1.4) | 0 | 3 | 0 |
| Dizziness                         | 3 (1.4) | 0 | 0 | 3 |
| Stomatitis                        | 3 (1.4) | 0 | 0 | 3 |
| Hyperkalemia                      | 3 (1.4) | 0 | 1 | 2 |
| Constipation                      | 2 (1.0) | 0 | 0 | 2 |
| Hemoptysis                        | 2 (1.0) | 0 | 2 | 0 |
| Chest discomfort                  | 2 (1.0) | 0 | 1 | 1 |
| Knee pain                         | 2 (1.0) | 0 | 0 | 2 |
| Tingling sensation                | 2 (1.0) | 0 | 0 | 2 |
| Hypercalcemia                     | 2 (1.0) | 0 | 0 | 2 |
| Cough                             | 2 (1.0) | 0 | 0 | 2 |
| Hematuria                         | 2 (1.0) | 0 | 1 | 1 |
| Hyperuricemia                     | 2 (1.0) | 0 | 0 | 2 |
| Arm pain                          | 1 (0.5) | 0 | 0 | 1 |
| Autoimmune hepatitis              | 1 (0.5) | 0 | 1 | 0 |
| Esophageal ulcer                  | 1 (0.5) | 0 | 1 | 0 |
| Septic shock due to cholangitis   | 1 (0.5) | 0 | 1 | 0 |
| Pneumothorax                      | 1 (0.5) | 0 | 1 | 0 |
| Spontaneous bacterial peritonitis | 1 (0.5) | 0 | 1 | 0 |
| Hemobilia                         | 1 (0.5) | 0 | 1 | 0 |
| Fracture                          | 1 (0.5) | 0 | 1 | 0 |
| Bowel necrosis                    | 1 (0.5) | 0 | 1 | 0 |

|                             |         |   |   |   |
|-----------------------------|---------|---|---|---|
| Nocturia                    | 1 (0.5) | 0 | 0 | 1 |
| Hand foot syndrome          | 1 (0.5) | 0 | 0 | 1 |
| Hypogeusia                  | 1 (0.5) | 0 | 0 | 1 |
| Periodontitis               | 1 (0.5) | 0 | 0 | 1 |
| Right inguinal pain         | 1 (0.5) | 0 | 0 | 1 |
| Nose bleeding               | 1 (0.5) | 0 | 0 | 1 |
| Perianal fistula            | 1 (0.5) | 0 | 1 | 0 |
| Duodenitis                  | 1 (0.5) | 0 | 0 | 1 |
| Vomiting                    | 1 (0.5) | 0 | 0 | 1 |
| Right leg pain              | 1 (0.5) | 0 | 0 | 1 |
| Weight loss                 | 1 (0.5) | 0 | 0 | 1 |
| Brain mass                  | 1 (0.5) | 0 | 1 | 0 |
| Hypersensitivity vasculitis | 1 (0.5) | 0 | 0 | 1 |
| Nausea                      | 1 (0.5) | 0 | 0 | 1 |
| Nasal discharge             | 1 (0.5) | 0 | 0 | 1 |
| Vesicle                     | 1 (0.5) | 0 | 0 | 1 |
| Toothache                   | 1 (0.5) | 0 | 0 | 1 |
| Ureter stone                | 1 (0.5) | 0 | 1 | 0 |
| Duodenal perforation        | 1 (0.5) | 1 | 0 | 0 |
| Limb weakness               | 1 (0.5) | 0 | 1 | 0 |

---

Figure S1. The mechanism of atezolizumab plus bevacizumab and radiation therapy combined with atezolizumab plus bevacizumab against hepatocellular carcinoma. <sup>a</sup> blocks the interaction between PD-L1 and B7.1 on immune cells to enhance T-cell priming; restores anti-cancer immunity through reactivation of T-cell mediated tumour cell killing [53]. <sup>b</sup> Normalises tumour vasculature, increasing T-cell infiltration [54–58]; Decreases the activity of immunosuppressive cells (MDSCs and Tregs) [54, 55, 59–62]; Promotes DC maturation [54,63,64].

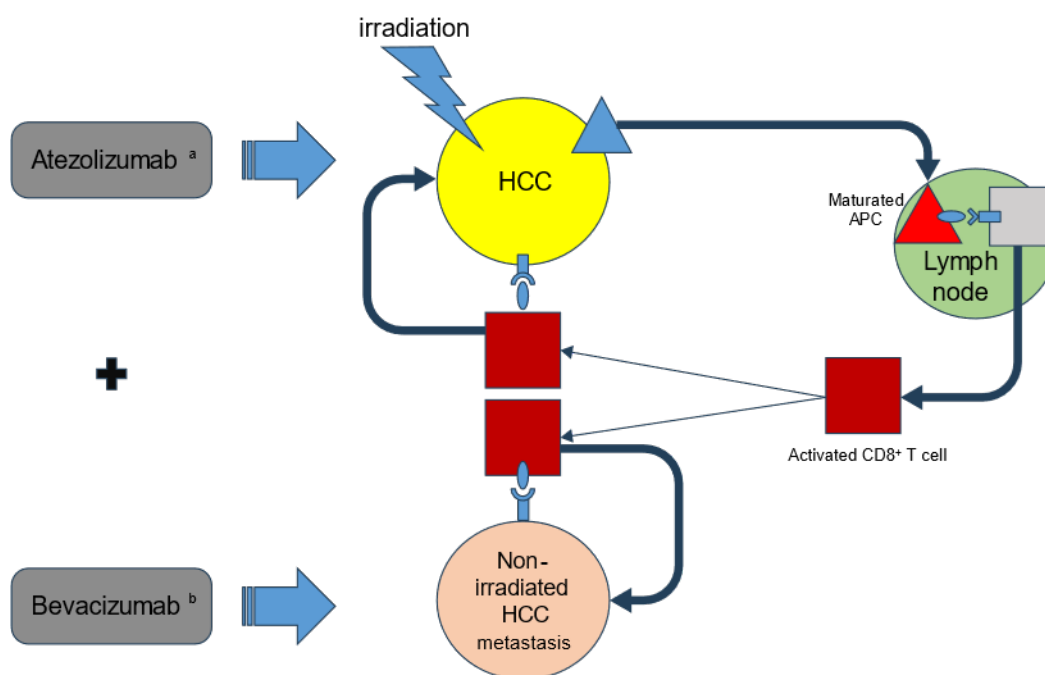

HCC, hepatocellular carcinoma; APC, antigen presenting cell; DC, dendritic cell.

Figure S2. Comprehensive flow sheet. In this study, ATE+BEV had consistent efficacy and tolerability in the total population and in the high-risk population. Receipt of neoadjuvant or concomitant radiation therapy might be helpful to improve the progression free survival and overall survival in the high-risk group.

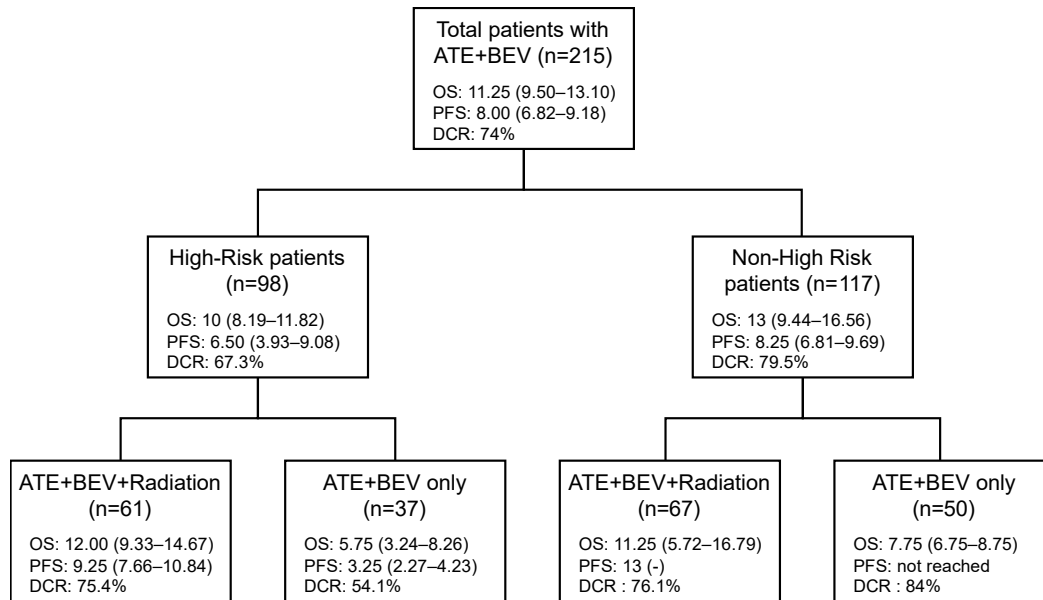

ATE, atezolizumab; BEV bevacizumab; OS, overall survival; PFS, progression free survival; DCR, disease control rate.

Figure S3. Infographic abstract

To evaluate the real-world efficacy and safety of atezolizumab plus bevacizumab in high risk (grade Vp4 portal vein thrombus, bile duct invasion, or more than 50% liver infiltration) patients with advanced hepatocellular carcinoma.

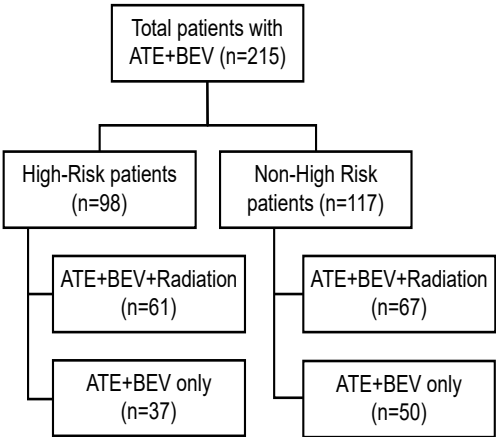

|                             | OS (months)         | PFS (months)              |
|-----------------------------|---------------------|---------------------------|
| Overall group (N=215)       | 11.25 (9.50-13.10)  | 8.00 (6.82–9.18)          |
| High-risk group (N=98)      | 10 (8.19-11.82)*    | 6.50 (3.93–9.08)#         |
| with RT (N=61)              | 12.00 (9.33-14.67)§ | 9.25 (7.66–10.84)§        |
| without RT (N=37)           | 5.75 (3.24-8.26)§   | 3.25 (2.27–4.23)§         |
| Non-high risk group (N=117) | 13 (9.44-16.56)*    | 8.25 (95% CI, 6.81–9.69)# |

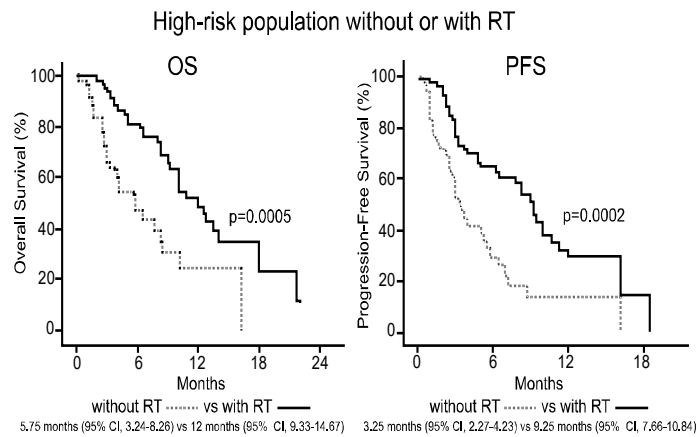

In this study, ATE+BEV had consistent efficacy and tolerability in the total population and in the high-risk population. Receipt of neoadjuvant or concomitant radiation therapy might be helpful to improve the progression free survival and overall survival in the high-risk group.

ATE, atezolizumab; BEV bevacizumab; OS, overall survival; PFS, progression free survival; RT, radiation therapy.

\*  $p=0.004$ ,

#  $p=0.010$

§  $p<0.001$

Figure S4. Comparative finding of pre and post treatment.

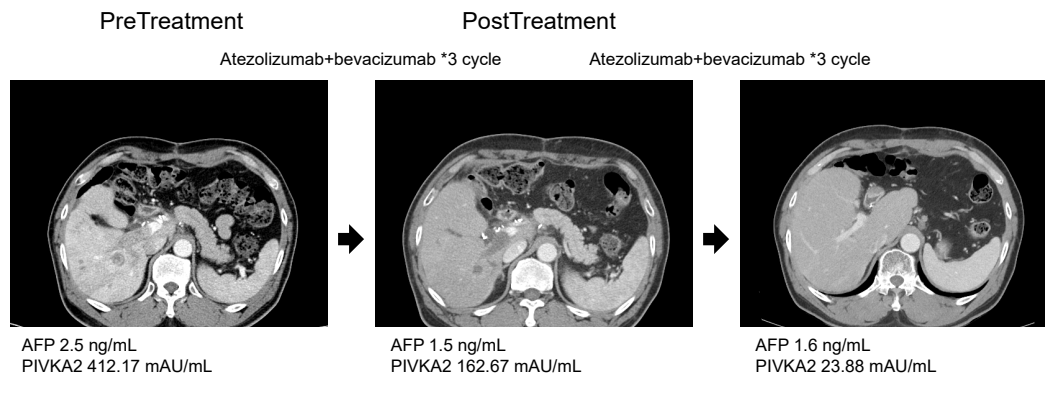

The patient was a 65-year-old male patient who had liver cirrhosis due to hepatitis B and was taking tenofovir. Pretreatment MRI and CT scans showed multiple hepatocellular carcinoma (HCC) and portal vein tumor thrombosis (PVTT) at the time of visit, so atezolizumab and bevacizumab was started. After 3 cycles of treatment, in the CT scan, the HCC became smaller, PVTT improved, and PIVKA2 decreased. After 3 more cycles of atezolizumab + bevacizumab, PVTT improved significantly in the CT scan, and there was no intrahepatic HCC and lymph node metastasis, and PIVKA2 decreased to normal values, indicating a complete response.

## References

53. Chen, D.S.; Mellman, I. Oncology meets immunology: the cancer-immunity cycle. *Immun.* **2013**, *39*, 1–10. doi: 10.1016/j.immuni.2013.07.012.
54. Hedge, P.S.; Wallin, J.J.; Mancao, C. Predictive markers of anti-VEGF and emerging role of angiogenesis inhibitors as immunotherapeutics. *Semin. Cancer Biol.* **2018**, *52*, 117–124.
55. Wallin, J.J.; Bendell, J.C.; Funke, R.; Sznol, M.; Korski, K.; Jones, S.; Hernandez, G.; Mier, J.; He, X.; Hodi, F.S.; et al. Atezolizumab in combination with bevacizumab enhances antigen-specific T-cell migration in metastatic renal cell carcinoma. *Nat. Commun.* **2016**, *7*, 12624. doi: 10.1038/ncomms12624.
56. Goel, S.; Duda, D.G.; Xu, L.; Munn, L.L.; Boucher, Y.; Fukumura, D.; Jain, R.K. Normalization of the vasculature for treatment of cancer and other diseases. *Physiol. Rev.* **2011**, *91*, 1071–121. doi: 10.1152/physrev.00038.2010.
57. Motz, G.T.; Santoro, S.P.; Wang, L.P.; Garrabrant, T.; Lastra, R.R.; Hagemann, I.S.; Lal, P.; Feldman, M.D.; Benecia, F.; Coukos, G. Tumor endothelium FasL establishes a selective immune barrier promoting tolerance in tumors. *Nat. Med.* **2014**, *20*, 607–15. doi: 10.1038/nm.3541.
58. Voron, T.; Colussi, O.; Marcheteau, E.; Pernot, S.; Nizard, M.; Pointet, A.L.; Latreche, S.; Bergaya, S.; Benhamouda, N.; Tonchot, C.; et al. VEGF-A modulates expression of inhibitory checkpoints on CD8+ T cells in tumors. *J. Exp. Med.* **2015**, *212*, 139–48. doi: 10.1084/jem.20140559.
59. Gabrilovich, D.I.; Nagaraj, S. Myeloid-derived suppressor cells as regulators of the immune system. *Nat.Rev. Immunol.* **2009**, *9*, 162–74. doi: 10.1038/nri2506.
60. Roland, C.L.; Lynn, K.D.; Toombs, J.E.; Dineen, S.P.; Udugamasooriya, D.G.; Brekken, R.A. Cytokine levels correlate with immune cell infiltration after anti-VEGF therapy in preclinical mouse models of breast cancer. *PLoS One.* **2009**, *4*, e7669. doi: 10.1371/journal.pone.0007669.
61. Facciabene, A.; Peng, X.; Hagemann, I.S.; Balint, K.; Barchetti, A.; Wang, L.P.; Gimotty, P.A.; Gilks, C.B.; Lal, P.; Zhang, L. et al. Tumour hypoxia promotes tolerance and angiogenesis via CCL28 and T(reg) cells. *Nature.* **2011**, *475*, 226–30. doi: 10.1038/nature10169.
62. Oyama, T.; Ran, S.; Ishida, T.; Nadaf, S.; Kerr, L.; Carbone, D.P.; Gabrilovich, D.I. Vascular endothelial growth factor affects dendritic cell maturation through the inhibition of nuclear factor-kappa B activation in hemopoietic progenitor cells. *J. Immunol.* **1998**, *160*, 1224–32.
63. Gabrilovich, D.I.; Chen, H.L.; Girgis, K.R.; Cunningham, H.T.; Meny, G.M.; Nadaf, S.; Kavanaugh, D.; Carbone, D.P. Production of vascular endothelial growth factor by human tumors inhibits the functional maturation of dendritic cells. *Nat. Med.* **1996**, *2*, 1096–103. doi: 10.1038/nm1096-1096.
64. Hodi, F.S.; Lawrence, D.; Lezcano, C.; Wu, X.; Zhou, J.; Sasada, T.; Zeng, W.; Giobbie-Hurder, A.; Atkins, M.B.; Ibrahim, N.; et al. Bevacizumab plus ipilimumab in patients with metastatic melanoma. *Cancer Immunol. Res.* **2014**, *2*, 63242. doi: 10.1158/2326-6066.CIR-14-0053.
